# Supplementary material for: Structure and function of microbial α-l-fucosidases: a mini review
Source: PubMed Central journal article supplement (PMC10154630; doi:10.1042/ebc20220158), 2023-04-18
Supplement: EBC-2022-0158C_supp.pdf [file EBC-2022-0158C_supp.pdf]

**Table S1 Number\* of  $\alpha$ -L -fucosidase-encoding genes in microbial genomes**

| Microbes                                                            | GH2 | GH9 | GH13 | GH14 | GH15 |
|---------------------------------------------------------------------|-----|-----|------|------|------|
|                                                                     | 9   | 5   | 9    | 1    | 1    |
| <i>Akkermansia muciniphila</i> MucT (ATCC BAA-835)                  | 4   | 2   | 0    | 0    | 0    |
| <i>Bacillus gobiensis</i> FJAT-4402                                 | 1   | 0   | 0    | 0    | 0    |
| <i>Bacteroides thetaiotaomicron</i> VPI-5482                        | 9   | 5   | 1    | 2    | 0    |
| <i>Bacteroides fragilis</i> NCTC 9343                               | 9   | 3   | 0    | 0    | 0    |
| <i>Bifidobacterium bifidum</i> JCM 1255                             | 1   | 1   | 0    | 0    | 0    |
| <i>Bifidobacterium longum</i> subsp. infantis ATCC 15697            | 3   | 1   | 0    | 0    | 2    |
| <i>Bifidobacterium longum</i> subsp. longum B2                      | 1   | 1   | 0    | 0    | 0    |
| <i>Bifidobacterium pseudocatenulatum</i> JCLA3                      | 0   | 1   | 0    | 0    | 0    |
| <i>Brachyspira pilosicoli</i> 95/1000                               | 1   | 0   | 0    | 0    | 0    |
| <i>Capnocytophaga ochracea</i> DSM 7271                             | 1   | 1   | 0    | 0    | 0    |
| <i>Clostridium perfringens</i> ATCC 13124                           | 2   | 1   | 0    | 0    | 0    |
| <i>Elizabethkingia meningoseptica</i> NCTC10016                     | 6   | 1   | 0    | 0    | 0    |
| <i>Emticicia oligotrophica</i> DSM 17448                            | 3   | 3   | 0    | 0    | 0    |
| <i>Flavobacterium anhuiense</i> T4                                  | 3   | 3   | 1    | 1    | 0    |
| <i>Lactacaseibacillus casei</i> BL23                                | 3   | 0   | 0    | 0    | 0    |
| <i>Lactacaseibacillus rhamnosus</i> GG                              | 3   | 0   | 0    | 0    | 0    |
| <i>Paenibacillus</i> sp. M-152                                      | 0   | 1   | 0    | 0    | 0    |
| <i>Paenibacillus thiaminolyticus</i> NRRL B-4156                    | 4   | 3   | 0    | 0    | 1    |
| <i>Pedobacter aquae</i> CJ43                                        | 5   | 6   | 1    | 1    | 0    |
| <i>Prevotella melaninogenica</i> ATCC 25845                         | 2   | 2   | 0    | 0    | 0    |
| <i>Propionibacterium acidifaciens</i> FDAARGOS_576                  | 0   | 1   | 0    | 0    | 0    |
| <i>Roseburia intestinalis</i> L1-82                                 | 1   | 1   | 0    | 0    | 0    |
| <i>Ruminococcus gnavus</i> ATCC 29149                               | 2   | 3   | 0    | 0    | 1    |
| <i>Sphingobacterium</i> sp. B29                                     | 21  | 10  | 1    | 1    | 0    |
| <i>Sphingobacterium psychroaquaticum</i> SJ-25                      | 7   | 3   | 0    | 0    | 0    |
| <i>Spirosoma linguale</i> DSM 74                                    | 5   | 3   | 0    | 0    | 0    |
| <i>Streptococcus pneumoniae</i> TIGR4                               | 1   | 2   | 0    | 0    | 0    |
| <i>Streptomyces</i> sp. 11-1-2                                      | 4   | 5   | 0    | 1    | 0    |
| <i>Streptosporangium roseum</i> DSM 43021                           | 1   | 1   | 0    | 1    | 0    |
| <i>Saccharolobus solfataricus</i> P2 (Archea)                       | 1   | 0   | 0    | 0    | 0    |
| <i>Tannerella forsythia</i> 3313                                    | 2   | 1   | 0    | 0    | 0    |
| <i>Thermotoga maritima</i> MSB8                                     | 1   | 0   | 0    | 0    | 0    |
| <i>Vibrio</i> sp. EJY3                                              | 1   | 0   | 0    | 0    | 0    |
| <i>Wenyingzhuangia fucanilytica</i> CZ1127                          | 13  | 4   | 0    | 3    | 0    |
| <i>Xanthomonas campestris</i> pv. <i>campestris</i> str. ATCC 33913 | 2   | 1   | 0    | 0    | 0    |
| <i>Xanthomonas phaseoli</i> pv. <i>manihotis</i> CHN01              | 2   | 2   | 0    | 0    | 0    |

\*as per 2022-11-15 (<http://www.cazy.org/Genomes.html>)
